# Supplementary material for: Digital Knowledge Translation Tools for Disseminating Sexual and Reproductive Health Information to Adolescents: Protocol for an Evidence Gap Map Review
Source: PubMed Central journal article supplement (PMC10900081; doi:10.2196/55081), 2024-02-13
Supplement: resprot_v13i1e55081_app1.pdf [file resprot_v13i1e55081_app1.pdf]

## Supplementary File 1 - Preliminary Medline Search Strategy

Ovid MEDLINE(R) ALL <1946 to May 11, 2022>

Date of search: April 12, 2023

- 1 child/ or adolescent/ or young adult/ or (Adolescen\* or teen\* or youth? or "young people" or "younger people" or "young adult?" or "young women" or "young men" or "school age\*" or student? or "middle schooler?" or "high schooler?" or "secondary school" or p?ediatric\*).mp. 4048999
- 2 Sexual Health/ or exp Sexual Behavior/ 118798
- 3 Reproductive Rights/ 1077
- 4 ("Sexual health" or "sexual behavior?" or "sexual health right?").mp. 104713
- 5 Reproductive Health/ 4568
- 6 exp contraceptive agents/ or exp contraceptive agents, female/ or exp contraceptives, oral/ or exp contraceptives, postcoital/ or exp contraceptive agents, hormonal/ or exp contraceptive agents, male/ 77369
- 7 contraceptive devices/ or exp contraceptive devices, female/ or exp intrauterine devices/ or exp intrauterine devices, medicated/ or exp contraceptive devices, male/ 26599
- 8 pregnancy/ or pregnancy in adolescence/ or pregnancy, unplanned/ or pregnancy, unwanted/ 949650
- 9 exp Abortion, Induced/ 41756
- 10 Fertility/ 43014
- 11 ("Reproductive health\*" or "sexual health\*" or contracepti\* or condom? or "birth control" or IUD or "intrauterine device?" or "family planning" or pregnanc\* or pregnant or abortion? or abstin\* or fertility or childbearing).mp. 1291278
- 12 Sexually transmitted diseases/ or exp Sexually transmitted diseases, bacterial/ or exp Hepatitis C/ or exp HIV/ or (("sexual\* transmi\*" adj4 infection\*) or "sexual\* transmi\* disease\*" or STI or STIs or STD or STDs or STBBI or STBBIs or HIV or AIDS or hepatitis or HepC or chlamydia or gonorrh?ea or syphili\*).ti,ab,kw. 740820
- 13 Sex Education/ 9127
- 14 sex\* education.mp. 14886
- 15 gender-based violence/ or intimate partner violence/ or physical abuse/ or rape/ or Sex Offenses/ 21710
- 16 ("gender-based violence" or "dating violence" or "partner violence" or "gender-based abuse" or "dating abuse" or "partner violence" or "consensual sex" or rape\* or "safe sex").mp. 35309
- 17 health services accessibility/ or right to health/ 83346
- 18 exp Reproductive Health Services/ 42767
- 19 ("sexual health clinic?" or "sexual health services" or "sexual health screen\*" or "sexual health test\*" or "sexual health check-up?").mp. 1710
- 20 menstrual cycle/ or menstruation/ 29087
- 21 exp Feminine Hygiene Products/ 2024

22 (menstruat\* or menstrual or "female hygiene" or "feminine hygiene" or tampon? or (sanitary adj1 (pad? or napkin\* or towel\*)) or douch\* or "vagin\* wash\*" or "vagin\* clean\*").mp. 71916

23 Marriage/ and (child\* or underage\* or minor\* or adolescen\* or teen).ab. 5353

24 ((child\* or underage\* or minor\* or adolescen\* or teen) adj2 (marriage or marry or married or marries)).mp. 1831

25 Circumcision, Female/ 1583

26 ("female genital mutilation" or "female circumcis\*").mp. 1678

27 Sexual Partners/ 19485

28 exp Coitus/ 7793

29 ("sex\* partner\*" or "sexual intercourse" or "sexual relationship\*" or coitus).mp. 48352

30 Sex Workers/ 2763

31 ("sex work\*" or "transactional sex\*" or prostitut\* or "sex\* slave\*").mp. 13311

32 exp perinatal care/ or preconception care/ or prenatal care/ 42250

33 (prenatal or pre-natal or prepartum or pre-partum or preconception or pre-conception or perinatal or antenatal or ante-natal or antepartum or ante-partum or postnatal or post-natal or postpartum or post-partum).mp. 443270

34 or/2-332372280

35 1 and 34 432850

36 ((digital or virtual or online or internet or web-based) adj4 (translation or shar\* or communicat\* or inform\* or messag\*)).mp. 24771

37 Communication/ and (digital\* or virtual\* or online or internet or web-based).ab. 5210

38 exp Internet/ 92304

39 mobile applications/ or web browser/ 11351

40 blogging/ or exp mass media/ or radio/ or exp cell phone/ or television/ 68437

41 Electronic Mail/ 2893

42 (website\* or internet or virtual\* or online or web-based or web or digital\*).mp. 722254

43 ("mobile app\*" or smartphone\* or "smart phone\*" or "cell phone\*" or cellphone\* or "mobile phone" or iPhone\* or iPad or android or Samsung or apple or mHealth or "text messag\*" or "SMS messag\*" or iMessage\*).mp. 70657

44 (email\* or "electronic mail\*" or "electronic messag\*").mp. 14468

45 ((digital\* or virtual\* or online or internet or web\* or electronic\*) adj3 (brochure\* or pamphlet\* or booklet\* or leaflet\* or handout\* or hand-out\* or flyer\* or information or literature)).mp.26697

46 (podcast\* or webcast\* or "web cast\*" or radio or video? or television or TV or YouTube or Spotify or Tidal or "amazon music" or "amazon video" or iTunes or "google music" or "google video" or "google store").mp. 299979

47 ("social media" or instagram or Facebook or TikTok or "tik Tok" or twitter or Tumblr or WhatsApp or Snapchat or reddit or Pinterest or LinkedIn or WeChat or QQ or QZone or "Baidu tieba" or Viber).mp. 31872

48 or/36-47 1091922

49 translational medical research/ or diffusion of innovation/ or quality improvement/ or models, organizational/ or health impact assessment/ or program planning/ or health services research/ 115861

50 ((translat\* or implement\* or adopt\* or uptake or scale) and (change\* or improv\* or research or knowledge or information or innovat\* or evidence or outcome\*)).mp. 1896397

51 (((change or improv\* or implement\*) adj3 (manag\* or strateg\* or success\*)) or (quality adj1 improv\*)).mp. or (chang\* or improv\*).ti. 1076004

52 Organizational Innovation/ or exp Health Services Accessibility/og, fs 35979

53 (((Knowledge or evidence or research or innovation or information) adj4 (translat\* or transfer\* or mobiliz\* or mobilis\* or exchange or implement\* or disseminat\* or utiliz\* or utilis\* or uptake or adopt\* or communicat\* or sharing or educat\*)) or "research into practice" or "evidence into practice" or "knowledge to action" or "knowledge gap\*" or "research to policy" or "translational science" or "implementation science" or "decision making" or "policy making").mp. 519716

54 exp Evidence-Based Practice/ 92873

55 ("health\* innovation\*" or "health care innovation\*").mp. 1074

56 ("evidence-based" or "evidence-informed" or EBP or EBM or EBI).ti,ab. 148096

57 or/49-56 3339862

58 35 and 48 and 57 5898

59 limit 58 to yr="2012 -Current" 4694

60 (editorial or letter or note or opinion).pt. 1784211

61 59 not 60 4668
